# Supplementary material for: FlexPepDock lessons from CAPRI peptide–protein rounds and suggested new criteria for assessment of model quality and utility
Source: PubMed Central journal article supplement (PMC6618814; doi:10.1002/prot.25230), 2017-02-16

## Supplementary material for review

### Command line parameters

#### \* Rosetta FlexPepDock prepacking

```
$FlexPepDocking.{ext} -database ${rosetta_db} -s start.pdb -native native.pdb -  
flexpep_prepack -ex1 -ex2aro -unboundrot unbound_receptor.pdb
```

#### \* Rosetta FlexPepDock refinement

```
$FlexPepDocking.{ext} -database ${rosetta_db} -s start_0001.pdb -native native.pdb - -  
pep_refine -ex1 -ex2aro -use_input_sc -unboundrot unbound_receptor.pdb -nstruct 100 [-  
lowres_preoptimize]
```

#### \* Rosetta FlexPepDock *ab initio* modeling

```
$FlexPepDocking.{ext} -database ${rosetta_db} -s start_0001.pdb -native native.pdb -  
out:file:silent decoys.silent -out:file:silent_struct_type binary -lowres_abinitio -pep_refine -  
ex1 -ex2aro -use_input_sc -unboundrot unbound_receptor.pdb -frag3 <frag3 file> -  
flexPepDocking:frag5 <frag5 file> -frag9 <frag9 file> -nstruct 50000
```

#### \* Rosetta fixed backbone design

```
$fixbb.{ext} -database ${rosetta_db} -s template.pdb -resfile peptide_resfile -ex1 -ex2aro -  
use_input_sc -unboundrot unbound_receptor.pdb -nstruct 1
```

For more details, see also

[www.rosettacommons.org/docs/latest/application\\_documentation/docking/flex-pep-dock](http://www.rosettacommons.org/docs/latest/application_documentation/docking/flex-pep-dock).

## Supplementary Tables

**Table SI** Spearman rank-correlations between the different alanine scanning protocols, on mutations shown in Figure 2. P-values are given in parentheses.

Spearman correlations:

| Spearman correlation | Robetta | RosettaScripts   | FoldX2.5.2      | FoldX3.0         | mCSM             |
|----------------------|---------|------------------|-----------------|------------------|------------------|
| Robetta              | 1       | 0.85<br>(0.0004) | 0.63<br>(0.024) | 0.73<br>(0.0063) | 0.49<br>(0.093)  |
| RosettaScripts       |         | 1                | 0.79<br>(0.002) | 0.83<br>(0.0008) | 0.60<br>(0.034)  |
| FoldX2.5.2           |         |                  | 1               | 0.57<br>(0.0449) | 0.32<br>(0.28)   |
| FoldX3.0             |         |                  |                 | 1                | 0.58<br>(0.0425) |
| mCSM                 |         |                  |                 |                  | 1                |

## Supplementary Figures

**Supplementary Figure 1:** Stronger convergence in a peptide docking simulation on a bound receptor conformation of a homologous WW domain (dystrophin, PDB id 1eg4<sup>37</sup>) (A) compared to the unbound structure template provided for T67 (B).

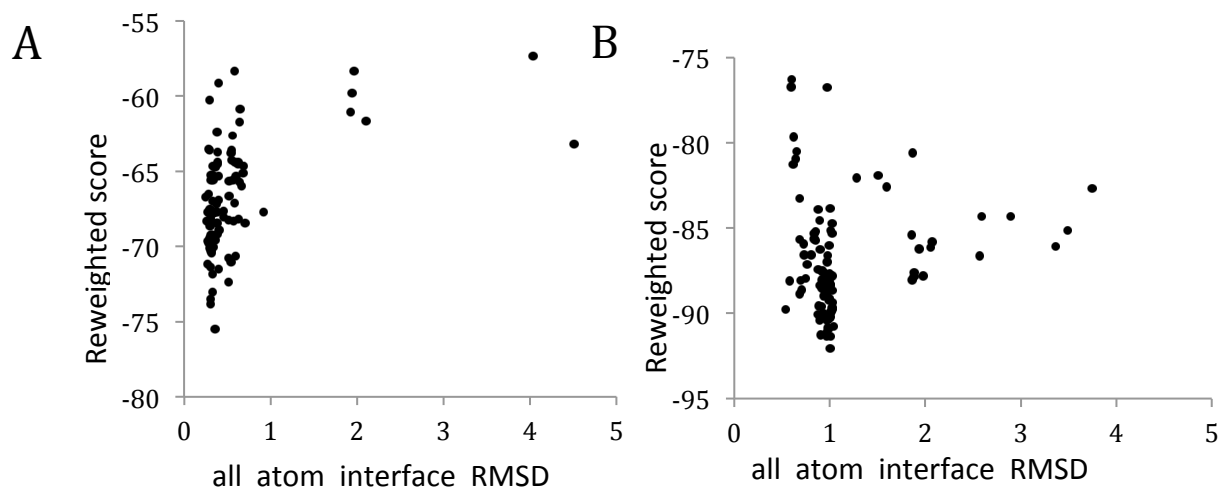

## Supplementary Figure 2:

**Left:** A local FlexPepDock refinement run starting from the solved structure of T66 results in considerable divergence, indicating that even if starting from a nearby structure, an accurate model would not be created. This might also indicate a poorly-resolved structure, as also supported by poor electron density in the region of the binding pocket. **Right:** For comparison, a corresponding local refinement run for T65 converges to a funnel within 0.5 Å RMSD.

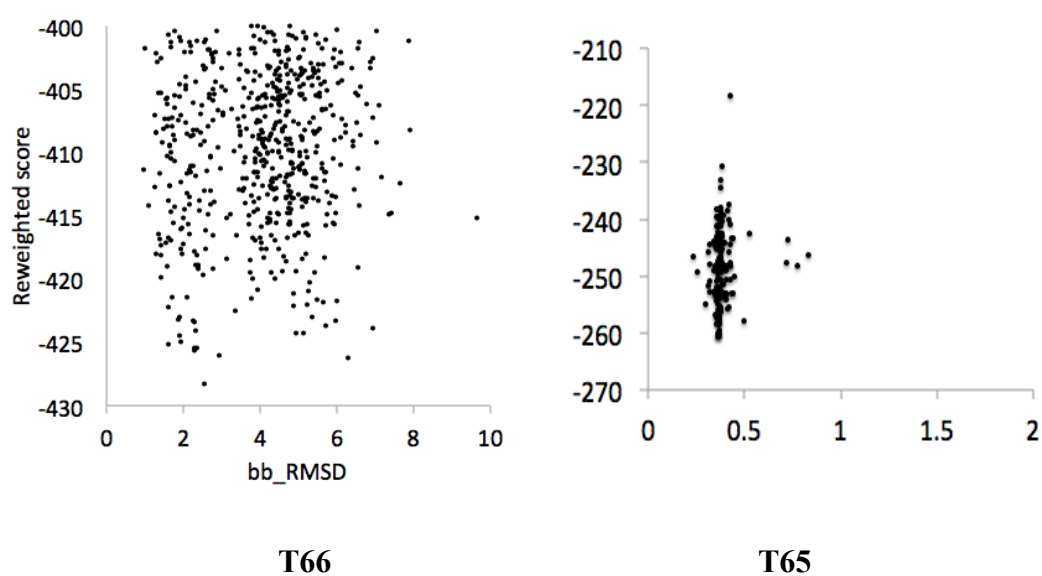

**Supplementary Figure S3:** Computational alanine scanning produces similar results using different structures of the same interaction. Representative results are shown for FoldX2.5 applied to T60-T64 (see also **Figure 2**).

| Position     | T60   | T61   | T62   | T63   | T64   |
|--------------|-------|-------|-------|-------|-------|
| <b>R315A</b> | 0.98  | 0.42  | 0.52  | 0.98  | 0.45  |
| N319A        | 0.06  | 0.15  | 0.08  | 0.10  | 0.17  |
| V321A        | -0.11 | -0.11 | -0.25 | -0.09 | -0.22 |
| T322A        | 0.33  | 0.36  | 0.39  | 1.33  | 1.40  |
| D325A        | 3.71  | 1.16  | 1.21  | 1.65  | 1.30  |
| T328A        | 1.03  | 0.70  | 1.23  | 1.04  | 1.06  |
| K353A        | 0.14  | 0.04  | -0.03 | 0.23  | 0.02  |
| E354A        | 1.03  | 1.27  | 0.74  | 0.63  | 0.54  |
| W357A        | 3.62  | 3.44  | 3.57  | 3.59  | 3.71  |
| S360A        | 1.52  | 1.44  | 1.62  | 0.93  | 1.55  |
| N361A        | 1.37  | 1.39  | 1.64  | 1.35  | 1.61  |
| K392A        | 0.12  | 0.31  | 0.31  | 0.25  | 0.08  |
| K395A        | 0.09  | 0.02  | 0.03  | 0.08  | -0.02 |
| <b>E396A</b> | 3.75  | 3.31  | 2.91  | 1.36  | 3.09  |
| W399A        | 1.29  | 1.02  | 0.99  | 0.98  | 1.03  |
| N403A        | 1.07  | X     | 0.43  | 0.21  | 1.14  |
| S406A        | -0.41 | -0.34 | -0.38 | -0.26 | 0.22  |
| Q/R4A        | 0.27  | 0.38  | 0.92  | 0.45  | 0.71  |
| <b>K5A</b>   | 3.05  | 2.90  | 3.67  | 2.83  | 3.16  |
| <b>R6A</b>   | 5.62  | 5.19  | 5.25  | 3.26  | 4.95  |
| 7A           | -0.05 | 0.00  | 0.06  | 1.04  | 1.27  |
| <b>Aro8A</b> | 1.49  | 1.25  | 0.66  | 1.35  | 0.90  |
| S/R9A        | -0.12 | -0.18 | -1.69 | -0.22 | -0.31 |
| <b>F12A</b>  | 2.81  | 2.05  | 2.15  | 1.84  | 2.33  |

**Supplementary Figure S4:** Full plot of correlation between different measures of model accuracy – S-RMSD (side chain) vs. I-RMSD (backbone) RMSD for models submitted to CAPRI.

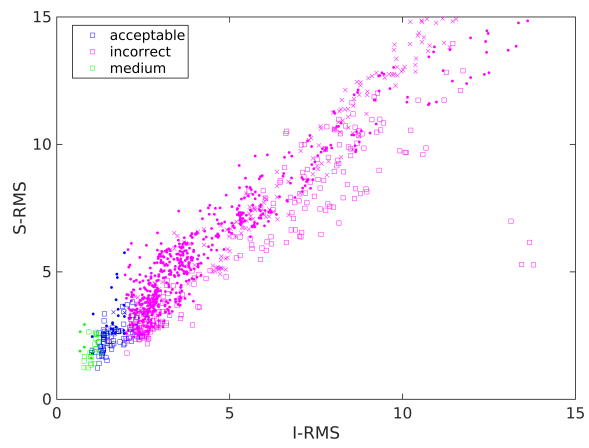

Supplement: PROT-85-445-s001.pdf [file PROT-85-445-s001.pdf]
